# Supplementary material for: Differential Proteomics in Dequeened Honeybee Colonies Reveals Lower Viral Load in Hemolymph of Fertile Worker Bees
Source: PubMed Central journal article supplement (PMC3115943; doi:10.1371/journal.pone.0020043), 2011-06-15
Supplement: pone.0020043.s002.pdf [file pone.0020043.s002.pdf]

## Supplemental File 1

Alignment of Kakugo virus (KV), Deformed wing virus (DWV) and Varroa destructor virus (VDV) (by ClustalW). Aligned sequences are obtained from the honeybee official gene set release 1 available at [http://genomes.arc.georgetown.edu/Amel\\_release1\\_OGS\\_pep.fa](http://genomes.arc.georgetown.edu/Amel_release1_OGS_pep.fa), which were the basis of the Mascot virus identifications (KV\_mascot and DWV\_mascot). In addition the most recent protein sequences of both KV (KV\_Fujiyuki\_2004), VDV (VDV\_Ongus\_2004) and DWV (DWV-Moore\_2011) have been aligned in order to reveal the identity of the virus involved in this experiment. The highlighted parts are the sequences which are included in the Mascot identification, based on sequence data obtained from Maldi TOF TOF analysis. Based on current information, VP1 and VP2 are identical to DWV proteins but VP3 fits better with a KV protein. However, the DWV, KV and VDV are highly similar viruses and difficult to distinguish on the protein level. Probably they are variants of the same virus. The borders of VP1, VP2 and VP3 are indicated.

Spot 547 (identified as Kakugo virus): VP1

Spot 549 (identified as Kakugo virus): VP1

Spot 742 (identified as Deformed wing virus): VP2

Spot 813 (identified as Deformed wing virus): VP3

```
KV_mascot          MAFSCGTL SYAAVAQAPSVAHAPRSWEIDEARRRRVIKRLALEQERIRNV 50
VDV_Ongus_2004    MAFSCGTL SYAAVAQAPSVAHAPRSWEIDEARRRRVIKRLALEQERIRNV 50
DWV_mascot        MAFSCGTL SYAAVAQAPSVAHAPRSWEIDEARRRRVIKRLALEQERIRNV 50
DWV-Moore_2011    MAFSCGTL SYAAVAQAPSVAHAPRSWEIDEARRRRVIKRLALEQERIRNV 50
KV_Fujiyuki_2004  MAFSCGTL SYAVTQAPSVAYAPRTWEVDEARRRRVIKRLALEQERIRNV 50
                  *****: ** :*****:***: ** :*****
                  *****

KV_mascot          LDVTVYDHTTWEQEDARDNEFLMEQLNNLYTIYSIAERCTRRPVQEHVPI 100
VDV_Ongus_2004    LDVTVYDHTTWEQEDARDNEFLMEQLNNLYTIYSIAERCTRRPVQEHVPI 100
DWV_mascot        LDVTVYDHTTWEQEDARDNEFLTEQLNNLYTIYSIAERCTRRPVQEHVPI 100
DWV-Moore_2011    LDVTVYDHTTWEQEDARDNEFLTEQLNNLYTIYSIAERCTRRPVQEHVPI 100
KV_Fujiyuki_2004  LDVDVYNQATWEQEDVRDNEFLTEQLNNLYTIYSIAERCTRRPIKECSPI 100
                  *** **: : :*****.***** *****
                  *****

KV_mascot          SISNRYSPLESLKIEVGKDAGEFVFKKPKYTKICKKVKRVASKFVREKVV 150
VDV_Ongus_2004    SISNRYSPLESLKIEVGKDAGEFVFKKPKYTKICKKVKRVASKFVREKVV 150
DWV_mascot        SISNRYSPLESLKIEVGEDAGEFVFKKPKYTKICKKVKRVASKFVREKVV 150
DWV-Moore_2011    SISNRYSPLESLKIEVGKDAGEFVFKKPKYTKICKKVKRVASKFVREKVV 150
KV_Fujiyuki_2004  SVSNRFAPLESLKVEIGQEASECIFKKPKYTRVCKKVKRVATRFVREKVV 150
```

KV\_mascot RPVCNRS PMLLFKIKKVIYDLHLYRLRKQVRLLRREKQREYELECVTSL 200  
VDV\_Ongus\_2004 RPVCNRS PMLLFKIKKVIYDLHLYRLRKQVRLLRREKQREYELECVTSL 200  
DWV\_mascot RPVCNRS PMLLFKIKKVIYDLHLYRLRKQVRLLRREKQREYELECVTSL 200  
DWV-Moore\_2011 RPVCNRS PMLLFKIKKVIYDLHLYRLRKQVRLLRREKQREYELECVTSL 200  
KV\_Fujiyuki\_2004 RPMCPRS PMLLFKIKKVIYDLHLYRLRKQVRLLRREKQREYELECVTSL 200  
\*:\*\*\*:\*\*\*\*\*:\*:\*:\*.\* :\*\*\*\*\*:\*\*\*\*\*:\*\*\*\*\*:\*\*\*\*\*

KV\_mascot QLSNPVSAKPEMDNPNPGPDGEGEVELEKDSNVVLTQRPSTSI PAPT 250  
VDV\_Ongus\_2004 QLSNPVSAKPEMDNPNPGPDGEGEVELEKDSNVVLTQRPSTSI PAPT 250  
DWV\_mascot QLSNPVSAKPEMDNPNPGPDGEGEVELEKDSNVVLTQRPSTSI PAPT 250  
DWV-Moore\_2011 QLSNPVSAKPEMDNPNPGPDGEGEVELEKDSNVVLTQRPSTSI PAPT 250  
KV\_Fujiyuki\_2004 QLSNPVQAKPEMDNPNPGPDGEGEVELEKDSNVVLTQRPSTSI PAPT 250  
\*\*\*\*\* .\*\*\*\*\*:\*\*\*\*\*:\*\*\*\*\*:\*\*\*\*\*:\*\*\*\*\*.\*

**|=> VP2**

KV\_mascot VKWSRWTSNDVDDYATITSRWYQIAEFVWSKDDPFDKELARLILPRALL 300  
VDV\_Ongus\_2004 VKWSRWTSNDVDDYATITSRWYQIAEFVWSKDDPFDKELARLILPRALL 300  
DWV\_mascot VKWSRWTSNDVDDYATITSRWYQIAEFVWSKDDPFDKELARLILPRALL 300  
DWV-Moore\_2011 VKWSRWTSNDVDDYATITSRWYQIAEFVWSKDDPFDKELARLILPRALL 300  
KV\_Fujiyuki\_2004 VKWSRWTSNDVDDYATITSRWYQIAEFVWSKDDPFDKELARLILPRALL 300  
\*\*\*\*\*

KV\_mascot SSIEANSDAICDVPNTIPFKVHAYWRGDMEVRVQINSNKFQVGQLQATWY 350  
VDV\_Ongus\_2004 SSIEANSDAICDVPNTIPFKVHAYWRGDMEVRVQINSNKFQVGQLQATWY 350  
DWV\_mascot SSIEANSDAICDVPNTIPFKVHAYWRGDMEVRVQINSNKFQVGQLQATWY 350  
DWV-Moore\_2011 SSIEANSDAICDVPNTIPFKVHAYWRGDMEVRVQINSNKFQVGQLQATWY 350  
KV\_Fujiyuki\_2004 SSIEANSDAICDVPNTIPFKVPAYWRGDMEVRVQINSNKFQVGQLQATWY 350  
\*\*\*\*\* .\*\*\*\*\*:\*\*\*\*\*:\*\*\*\*\*:\*\*\*\*\*.\*

KV\_mascot YSDHENLNIQTKRSVYGFSHMDHALISASASNEAKLVI PFKHVYPFLPTR 400  
VDV\_Ongus\_2004 YSDHENLNIQTKRSVYGFSHMDHALISASASNEAKLVI PFKHVYPFLPTR 400  
DWV\_mascot YSDHENLNIQTKRSVYGFSHMDHALISASASNEAKLVI PFKHVYPFLPTR 400  
DWV-Moore\_2011 YSDHENLNIQTKRSVYGFSHMDHALISASASNEAKLMI PFKHVYPFLPTR 400  
KV\_Fujiyuki\_2004 YSDHENLNISSKRSVYGFSQMDHALISASASNEAKLVI PFKHVYPFLPTR 400  
\*\*\*\*\* .:\*\*\*\*\*:\*\*\*\*\*:\*\*\*\*\*:\*\*\*\*\*.\*

KV\_mascot VVPDWTGILDMGTLNIRVIAPLRMSATGPTTCNVVVFIKLNNSEFTGTS 450  
VDV\_Ongus\_2004 VVPDWTGILDMGTLNIRVIAPLRMSATGPTTCNVVVFIKLNNSEFTGTS 450  
DWV\_mascot VVPDWTGILDMGTLNIRVIAPLRMSATGPTTCNVVVFIKLNNSEFTGTS 450  
DWV-Moore\_2011 VVPDWTGILDMGTLNIRVIAPLRMSATGPTTCNVVVFIKLNNSEFTGTS 450  
KV\_Fujiyuki\_2004 IVPDWTGILDMGTLNIRVIAPLRMSATGPTTCNVVVFIKLNNSEFTGTS 450  
:\*\*\*\*\*:\*\*\*\*\*

KV\_mascot SGKFIYANQIRAKPEMDRVLNLAEGLLNNTVGGCNMDNPSYQQSPRHVFPT 500  
VDV\_Ongus\_2004 SGKFIYANQIRAKPEMDRVLNLAEGLLNNTVGGCNMDNPSYQQSPRHVFPT 500  
DWV\_mascot SGKFIYANQIRAKPEMDRVLNLAEGLLNNTVGGCNMDNPSYQQSPRHVFPT 500  
DWV-Moore\_2011 SGKFIYANQIRAKPEMDRVLNLAEGLLNNTVGGCNMDNPSYQQSPRHVFPT 500  
KV\_Fujiyuki\_2004 SGKFIYANQIRAKPEMDRVLNLAEGLLNNTVGGCNMDNPSYQQSPRHVFPT 500  
\*\*\*:\*.\*\*\*\*\* \*\*:\*\*\*\*\*:\*\*\* \*\*\*\*\*

VP2 <=| |=> VP1

KV\_mascot GMHSLALGTLNVEPLHALRLDASGTTQHPVGCAPDEDMTVSSIASRYGLI 550  
VDV\_Ongus\_2004 GMHSLALGTLNVEPLHALRLDASGTTQHPVGCAPDEDMTVSSIASRYGLI 550  
DWV\_mascot GMHSLALGTLNVEPLHALRLDASGTTQHPVGCAPDEDMTVSSIASRYGLI 550  
DWV-Moore\_2011 GMHSLALGTLNVEPLHALRLDASGTTQHPVGCAPDEDMTVSSIASRYGLI 550  
KV\_Fujiyuki\_2004 GMHSLALGTLNVEPLHALRLDASGTTQHPVGCAPDEDMTVSSIASRYGLI 550  
\*\*\*\*\*:\*\*\*\*\*

KV\_mascot RQVQWKKDHAKGSLLLQLDADPFVEQKIEGTNPISLYWFAPVGVVSSMFM 600  
VDV\_Ongus\_2004 RQVQWKKDHAKGSLLLQLDADPFVEQKIEGTNPISLYWFAPVGVVSSMFM 600  
DWV\_mascot RQVQWKKDHAKGSLLLQLDADPFVEQKIEGTNPISLYWFAPVGVVSSMFM 600  
DWV-Moore\_2011 RQVQWKKDHAKGSLLLQLDADPFVEQKIEGTNPISLYWFAPVGVVSSMFM 600  
KV\_Fujiyuki\_2004 RQVQWKKDHAKGSLLLQLDADPFVEQKIEGTNPISLYWFAPVGVVSSMFM 600  
\*\*:\*:\*\*\*\*\*:\*\*\*\*\*

KV\_mascot QWRGSLEYRFDIIASQFHTGRLIVGYVPGLTASLQRQMDYMKLKSSSYV 650  
VDV\_Ongus\_2004 QWRGSLEYRFDIIASQFHTGRLIVGYVPGLTASLQRQMDYMKLKSSSYV 650  
DWV\_mascot QWRGSLEYRFDIIASQFHTGRLIVGYVPGLTASLQRQMDYMKLKSSSYV 650  
DWV-Moore\_2011 QWRGSLEYRFDIIASQFHTGRLIVGYVPGLTASLQRQMDYMKLKSSSYV 650  
KV\_Fujiyuki\_2004 QWRGSLEYRFDIIASQFHTGRLIVGYVPGLTASLQRQMDYMKLKSSSYV 650  
\*\*\*\*\*:\*\*\*\*\*

KV\_mascot FDLQESNSFTFEVPYVSYRPWWVRKYGGNYLPSSTDAPSTLFMYVQVPLI 700  
VDV\_Ongus\_2004 FDLQESNSFTFEVPYVSYRPWWVRKYGGNYLPSSTDAPSTLFMYVQVPLI 700  
D WV\_mascot FDLQESNSFTFEVPYVSYRPWWVRKYGGNYLPSSTDAPSTLFMYVQVPLI 700  
D WV-Moore\_2011 FDLQESNSFTFEVPYVSYRPWWVRKYGGNYLPSSTDAPSTLFMYVQVPLI 700  
KV\_Fujiyuki\_2004 FDLQESNSFTFEVPYVSYRPWWVRKYGGNYLPSSTDAPSTLFMYVQVPLI 700  
\*\*\*\*\*

KV\_mascot PMEAVSDTIDINVYVRGGSSFVFCVPVQPSLGLNWNTDFILRNDEEYRAK 750  
VDV\_Ongus\_2004 PMEAVSDTIDINVYVRGGSSFVFCVPVQPSLGLNWNTDFILRNDEEYRAK 750  
D WV\_mascot PMEAVSDTIDINVYVRGGSSFVFCVPVQPSLGLNWNTDFILRNDEEYRAK 750  
D WV-Moore\_2011 PMEAVSDTIDINVYVRGGSSFVFCVPVQPSLGLNWNTDFILRNDEEYRAK 750  
KV\_Fujiyuki\_2004 PMEAVSDTIDINVYVRGGSSFVFCVPVQPSLGLNWNTDFILRNDEEYRAK 750  
\*\*\*\*\*

KV\_mascot NGYAPYYAGVWHSFNNSNSLVFRWGSASDQIAQWPTITVPRGELAFRLIR 800  
VDV\_Ongus\_2004 NGYAPYYAGVWHSFNNSNSLVFRWGSASDQIAQWPTITVPRGELAFRLIR 800  
D WV\_mascot NGYAPYYAGVWHSFNNSNSLVFRWGSASDQIAQWPTITVPRGELAFRLIR 800  
D WV-Moore\_2011 NGYAPYYAGVWHSFNNSNSLVFRWGSASDQIAQWPTITVPRGELAFRLIR 800  
KV\_Fujiyuki\_2004 TGYAPYYAGVWHSFNNSNSLVFRWGSASDQIAQWPTITVPRGELAFRLIX 800  
. \*\*\*\*\*:\*\*\*\*\*

KV\_mascot DAKQAAVGTQPWRTM VVWPSGHGYNIGIPTYNAERARQLAQHLYGGGSLT 850  
VDV\_Ongus\_2004 DAKQAAVGTQPWRTM VVWPSGHGYNIGIPTYNAERARQLAQHLYGGGSLT 850  
D WV\_mascot DAKQAAVGTQPWRTM VVWPSGHGYNIGIPTYNAERARQLAQHLYGGGSLT 850  
D WV-Moore\_2011 DAKQAAVGTQPWRTM VVWPSGHGYNIGIPTYNAERARQLAQHLYGGGSLT 850  
KV\_Fujiyuki\_2004 DGKQAAVGTQPWRTM VVWPSGHGYNIGIPTYNAERARQLAQHLYGGGSLT 850  
\* . \* \*\*\*\*\*

KV\_mascot DEKAKQLFVPANQQGPGKVSNGNPVWEVMRAPLATQQAHIQDFEFVEAVP 900  
VDV\_Ongus\_2004 DEKAKQLFVPANQQGPGKVSNGNPVWEVMRAPLATQQAHIQDFEFVEAVP 900  
D WV\_mascot DEKAKQLFVPANQQGPGKVSNGNPVWEVMRAPLATQQAHIQDFEFVEAVP 900  
D WV-Moore\_2011 DEKAKQLFVPANQQGPGKVSNGNPVWEVMRAPLATQQAHIQDFEFVEAVP 900  
KV\_Fujiyuki\_2004 DEKAKQLFVPANQQGPGKVSNGNPVWEVMRAPLATQRAHVQDFEFIEAIP 900  
\*\*\*\*\*.\*\*\*\*\*.\*\*\*.\*\*\*.\*

KV\_mascot EGEESRNTTVLDTTTTLQSSGFGRAFFGEAFNDLKTLMRRYQLYGQLLS 950  
VDV\_Ongus\_2004 EGEESRNTTVLDTTTTLQSSGFGRAFFGEAFNDLKTLMRRYQLYGQLLS 950  
DWV\_mascot EGEESRNTTVLDTTTTLQSSGFGRAFFGEAFNDLKTLMRRYQLYGQLLS 950  
DWV-Moore\_2011 EGEESRNTTVLDTTTTLQSSGFGRAFFGEAFNDLKTLMRRYQLYGQLLS 950  
KV\_Fujiyuki\_2004 EGEESRNTTVLDTTTTLQSSGFGRAFFGEAFNDLKTLMRRYQLYGQLLS 950

\*\*\*\*\*  
**VP1 <|=> VP3**

KV\_mascot VTTDKIDIDHCMFTFPCLPQGLALDIGSAGSPHEIFNRCRDGIIPLIASGY 1000  
VDV\_Ongus\_2004 VTTDKIDIDHCMFTFPCLPQGLALDIGSAGSPHEIFNRCRDGIIPLIASGY 1000  
DWV\_mascot VTTDKIDIDHCMFTFPCLPQGLALDIGSAGSPHEIFNRCRDGIIPLIASGY 1000  
DWV-Moore\_2011 VTTDKIDIDHCMFTFPCLPQGLALDIGSAGSPHEIFNRCRDGIIPLIASGY 1000  
KV\_Fujiyuki\_2004 VTTDKIDIDHCMFTFPCLPQGLALDIGSAGSPHEIFNRCRDGIIPLIASGY 1000

KV\_mascot RFYRGDLRFKIVFPSNVNSNIWVQHRPDRRLKGWSEAKIVNCDAVSTGQG 1050  
VDV\_Ongus\_2004 RFYRGDLRFKIVFPSNVNSNIWVQHRPDRRLKGWSEAKIVNCDAVSTGQG 1050  
DWV\_mascot RFYRGDLRFKIVFPSNVNSNIWVQHRPDRRLKGWSEAKIVNCDAVSTGQG 1050  
DWV-Moore\_2011 RFYRGDLRFKIVFPSNVNSNIWVQHRPDRRLKGWSEAKIVNCDAVSTGQG 1050  
KV\_Fujiyuki\_2004 RFYRGDLRYKIVFPSNVNSNIWVQHRPDRRLKGWSEAKIVNCDAVSTGQG 1050

KV\_mascot VYNHGYASHIQITRVNNVIELEVPFYNATCYNLQAFNPSSAASSYAVSL 1100  
VDV\_Ongus\_2004 VYNHGYASHIQITRVNNVIELEVPFYNATCYNLQAFNPSSAASSYAVSL 1100  
DWV\_mascot VYNHGYASHIQITRVNNVIELEVPFYNATCYNLQAFNPSSAASSYAVSL 1100  
DWV-Moore\_2011 VYNHGYASHIQITRVNNVIELEVPFYNATCYNLQAFNPSSAASSYAVSL 1100  
KV\_Fujiyuki\_2004 VYNHGYASHIQITRVNNVIELEVPFYNATCYNLQAFNPSSAASSYAVSL 1100

KV\_mascot GEISVGFQATSDDIAAIVNKPVTIYYSIGDGMQFSQWVGYPMMILDQLP 1150  
VDV\_Ongus\_2004 GEISVGFQATSDDIAAIVNKPVTIYYSIGDGMQFSQWVGYPMMILDQLP 1150  
DWV\_mascot GEISVGFQATSDDIAAIVNKPVTIYYSIGDGMQFSQWVGYPMMILDQLP 1150  
DWV-Moore\_2011 GEISVGFQATSDDIAAIVNKPVTIYYSIGDGMQFSQWVGYPMMILDQLP 1150  
KV\_Fujiyuki\_2004 GEISVGFQATSDDIASIVNKPVTIYYSIGDGMQFSQWVGYPMMILDQLP 1150

KV\_mascot APVVRVAVPEGPIAKIKNFFHQTADEVREAQAAKMREDMGIVVQDVIGELS 1200  
VDV\_Ongus\_2004 APVVRVAVPEGPIAKIKNFFHQTADEVREAQAAKMREDMGIVVQDVIGELS 1200  
DWV\_mascot APVVRVAVPEGPIAKIKNFFHQTADEVREAQAAKMREDMGIVVQDVIGELS 1200  
DWV-Moore\_2011 APVVRVAVPEGPIAKIKNFFHQTADEVREAQAAKMREDMGIVVQDVIGELS 1200  
KV\_Fujiyuki\_2004 APVVRVAVPEGPIAKIKNFFHQTADEVREAQAAKMREDMGIVVQDVIGELS 1200  
\*\*\*\*\*:\*\*\*\*\*

**VP3 <=|**

KV\_mascot QAI PDLQQPEVQANVFSLSQLVHAIIGTSLKTVAWAIVSIFVTLGLIGR 1250  
VDV\_Ongus\_2004 QAI PDLQQPEVQANVFSLSQLVHAIIGTSLKTVAWAIVSIFVTLGLIGR 1250  
DWV\_mascot QAI PDLQQPEVQANVFSLSQLVHAIIGTSLKTVAWAIVSIFVTLGLIGR 1250  
DWV-Moore\_2011 QAI PDLQQPEVQANVFSLSQLVHAIIGTSLKTVAWAIVSIFVTLGLIGR 1250  
KV\_Fujiyuki\_2004 QAI PDLQQPEVQANVFSLSQLVHAIIGTSLKTVAWAIVSIFVTLGLIGR 1250  
\*\*\*\*\*

KV\_mascot EMMHSVITVVKRLLLEKYHLATQPQESANS GTVISAIPEAPNAEAE EASAW 1300  
VDV\_Ongus\_2004 EMMHSVITVVKRLLLEKYHLATQPQESANS GTVISAIPEAPNAEAE EASAW 1300  
DWV\_mascot EMMHSVITVVKRLLLEKYHLATQPQESANS GTVISAVPEAPNAEAE EASAW 1300  
DWV-Moore\_2011 EMMHSVITVVKRLLLEKYHLATQPQESANS GTVISAVPEAPNAEAE EASAW 1300  
KV\_Fujiyuki\_2004 EMMHSVITVVKRLLLEKYHLATQPQESANS STVISAVPEAPNAEAE EASAW 1300  
\*\*\*\*\*.\*.\*\*\*\*\*:\*\*\*\*\*

KV\_mascot VSIIYNGVCNMLNVAAQPKQFKDWV KLATVDFSN NCRGSNQVFVFFKNT 1350  
VDV\_Ongus\_2004 VSIIYNGVCNMLNVAAQPKQFKDWV KLATVDFSN NCRGSNQVFVFFKNT 1350  
DWV\_mascot VSIIYNGVCNMLNVAAQPKQFKDWV KLATVDFSN NCRGSNQVFVFFKNT 1350  
DWV-Moore\_2011 VSIIYNGVCNMLNVAAQPKQFKDWV KLATVDFSN NCRGSNQVFVFFKNT 1350  
KV\_Fujiyuki\_2004 VSIIYNGVCNMLNVAAQPKQFKDWV KLATVDFSN NCRGSNQVFVFFKNT 1350  
\*\*\*\*\*

KV\_mascot FEVLKMMWGYVFCQSNPAARLLKAVNDEPEILKAWVKECLYLDDPKFRMR 1400  
VDV\_Ongus\_2004 FEVLKMMWGYVFCQSNPAARLLKAVNDEPEILKAWVKECLYLDDPKFRMR 1400  
DWV\_mascot FEVLKMMWGYVFCQSNPAARLLKAVNDEPEILKAWVKECLYLDDPKFRMR 1400  
DWV-Moore\_2011 FEVLKMMWGYVFCQSNPAARLLKAVNDEPEILKAWVKECLYLDDPKFRMR 1400  
KV\_Fujiyuki\_2004 FEVLKMMWGYVFCQSNPAARLLKAVNDEPEILKAWVKECLYLDDPKFRMR 1400  
\*\*\*\*\*

KV\_mascot RAHDQEYIERVFAAHSYGQILLHDLTAEMNQSRNLSVFTRVYDQISKLKT 1450  
VDV\_Ongus\_2004 RAHDQEYIERVFAAHSYGQILLHDLTAEMNQSRNLSVFTRVYDQISKLKT 1450  
DWV\_mascot RAHDQEYIERVFAAHSYGQILLHDLTAEMNQSRNLSVFTRVYDQISKLKT 1450  
DWV-Moore\_2011 RAHDQEYIERVFAAHSYGQILLHDLTAEMNQSRNLSVFTRVYDQISKLKT 1450  
KV\_Fujiyuki\_2004 RAHDQEYIERVFAAHSYGQILLHDLTAEMNQSRNLSVFTRVYDQISKLKT 1450  
\*\*\*\*\*

KV\_mascot DLMEMGSNPYIRRECF TICMGASGIGKSYLTDSLCSELLRASRTPVTTG 1500  
VDV\_Ongus\_2004 DLMEMGSNPYIRRECF TICMGASGIGKSYLTDSLCSELLRASRTPVTTG 1500  
DWV\_mascot DLMEMGSNPYIRRECF TICMGASGIGKSYLTDSLCSELLRASRTPVTTG 1500  
DWV-Moore\_2011 DLMEMGSNPYIRRECF TICMGASGIGKSYLTDSLCSELLRASRTPVTTG 1500  
KV\_Fujiyuki\_2004 DLMEMGSNPYIRRECF TICMGASGIGKSYLTDSLCSELLRASRTPVTTG 1500  
\*\*\*\*\*

KV\_mascot IKCVVNPLSDYWDQCFQPVLCVDDMWSVETSTTLDKQLNMLFQVHSPIV 1550  
VDV\_Ongus\_2004 IKCVVNPLSDYWDQCFQPVLCVDDMWSVETSTTLDKQLNMLFQVHSPIV 1550  
DWV\_mascot IKCVVNPLSDYWDQCFQPVLCVDDMWSVETSTTLDKQLNMLFQVHSPIV 1550  
DWV-Moore\_2011 IKCVVNPLSDYWDQCFQPVLCVDDMWSVETSTTLDKQLNMLFQVHSPIV 1550  
KV\_Fujiyuki\_2004 IKCVVNPLSDYWDQCFQPVLCVDDMWSVETSTTLDKQLNMLFQVHSPIV 1550  
\*\*\*\*\*

KV\_mascot LSPPKADLEGKKMRYNPEIFIYNTNKPFPRFDRIAMEAIYRRRNVLIECK 1600  
VDV\_Ongus\_2004 LSPPKADLEGKKMRYNPEIFIYNTNKPFPRFDRIAMEAIYRRRNVLIECK 1600  
DWV\_mascot LSPPKADLEGKKMRYNPEIFIYNTNKPFPRFDRIAMEAIYRRRNVLIECK 1600  
DWV-Moore\_2011 LSPPKADLEGKKMRYNPEIFIYNTNKPFPRFDRIAMEAIYRRRNVLIECK 1600  
KV\_Fujiyuki\_2004 LSPPKADLEGKKMRYNPEIFIYNTNKPFPRFDRIAMEAIYRRRNVLIECK 1600  
\*\*\*\*\*

KV\_mascot ANEEKKRGCKHCENNIPIAECSPKILKDFHHIKFRYAHDVCNSETTWSEW 1650  
VDV\_Ongus\_2004 ANEEKKRGCKHCENNIPIAECSPKILKDFHHIKFRYAHDVCNSETTWSEW 1650  
DWV\_mascot ASEEKRGCKHCEDDIPIAECSPKMLKDFHHIKFRYAHDVCNSETTWSEW 1650  
DWV-Moore\_2011 ASEEKRGCKHCENDIPIAECSPKMLQDFHHIKFRYAHDVCNSETTWSEW 1650  
KV\_Fujiyuki\_2004 ASEEKRGCKHCENDIPIAECSPKMLKDFHHIKFRYAHDVCNSETTWSEW 1650  
\*.\*\*\*\*\*.:\*\*\*\*\*.\*:\*\*\*\*\*

KV\_mascot MSYNEFLEWITPVYMANRRKANESFKMRVDEMQLRMDEPLEGDNILNKY 1700  
VDV\_Ongus\_2004 MSYNEFLEWITPVYMANRRKANESFKMRVDEMQLRMDEPLEGDNILNKY 1700  
DWV\_mascot MTYNEFLEWITPVYMANRRKANESFKMRVDEMQLRMDEPLEGDNILNKY 1700  
DWV-Moore\_2011 MTYSEFLEWITPVYMANRRKANESFKMRVDEMQLRMDEPLEGDNILNKY 1700  
KV\_Fujiyuki\_2004 MTYNEFLEWITPVYMANRRKANESFKMRVDEMQLRMDEPLEGDNILNKY 1700

KV\_mascot VEVNQRLVEEMKAFKERTLWADLQRVGSEISTSVKKALPTISITEKLPHW 1750  
VDV\_Ongus\_2004 VEVNQRLVEEMKAFKERTLWADLQRVGSEISTSVKKALPTISITEKLPHW 1750  
DWV\_mascot VEVNQRLVEEMKAFKERTLWSDLHRVGAEISASVKKALPTISITEKLPHW 1750  
DWV-Moore\_2011 VEVNQRLVEEMKAFKERTLWSDLHRVGAEISASVKKALPTISITEKLPHW 1750  
KV\_Fujiyuki\_2004 VEVNQRLVEEMKAFKERTLWSDLHRVGAEISASVKKALPTISITEKLPHW 1750  
\*\*\*\*\*:\*\*\*:\*\*\*:\*\*\*:\*\*\*\*\*

KV\_mascot TIQCGIAKPEMDHAYEVMSSYAAGMNAEIEAHEQVRRSSLECQYIEPSTS 1800  
VDV\_Ongus\_2004 TIQCGIAKPEMDHAYEVMSSYAAGMNAEIEAHEQVRRSSLECQYIEPSTS 1800  
DWV\_mascot TVQCGIAKPEMDHAYEVMSSYAAGMNAEIEAHEQVRRSSVEC----- 1792  
DWV-Moore\_2011 TVQCGIAKPEMDHAYEVMSSYAAGMNAEIEAHEQVRRSSVECQYAEPQAS 1800  
KV\_Fujiyuki\_2004 TVQCGIAKPEMDHAYEVMSSYAAGMNAEIEAHEQVRRSSVECQYAEPQAP 1800  
\*:\*\*\*\*\*:\*\*\*:\*\*\*:\*\*\*:\*\*\*\*\*

KV\_mascot RPLDEEGPTIDEELLGEVEFTSSALERLVDEGYITGKQKKYMATWCTKRR 1850  
VDV\_Ongus\_2004 RPLDEEGPTIDEELLGEVEFTSSALERLVDEGYITGKQKKYMATWCTKRR 1850  
DWV\_mascot -----  
DWV-Moore\_2011 RNPDEEGPTIDEELMGDTEFTSQALERLVDEGYITGKQKKYIATWCSKRR 1850  
KV\_Fujiyuki\_2004 RNPDEEGPTIDEELMGDTEFTSQALERLVDEGYITGKQKKYIATWCSKRR 1850

KV\_mascot EHVSDFDLVWTDNLRVLSAYVHERSTSTRLSTDDVKLFKTI SMLHQRYDT 1900  
VDV\_Ongus\_2004 EHVSDFDLVWTDNLRVLSAYVHERSTSTRLSTDDVKLFKTI SMLHQRYDT 1900  
DWV\_mascot -----  
DWV-Moore\_2011 EHTADFDLVWTDNLRVLSAYAHERSSTRLSTDDVKLYKTI SMLHQKYDT 1900  
KV\_Fujiyuki\_2004 EHTADFDLVWTDNLRVLSAYVHERSASTRLSTDDVKLYKTI SMLHQKYDT 1900

KV\_mascot TDCAKCQHWYAPLTAIYVDDRKLFWCQKETKTLDVRKLSKEDVTVQSKL 1950  
VDV\_Ongus\_2004 TDCAKCQHWYAPLTAIYVDDRKLFWCQKETKTLDVRKLSKEDVTVQSKL 1950  
DWV\_mascot -----  
DWV-Moore\_2011 TECAKCQHWYAPLTDIYVDDKKLFWCQKEKKTLDVRKLSKEDVTVQSKL 1950  
KV\_Fujiyuki\_2004 TECAKCQHWYAPLTDIYVDDKKLFWCQKEKKTLDVRKLSKEDVTVQSKL 1950

KV\_mascot INLSVPCGDVCMHLSKYFNLYL FHKAWLFENPTWRLIYNGTKKGMPEYFMN 2000  
VDV\_Ongus\_2004 INLSVPCGDVCMHLSKYFNLYL FHKAWLFENPTWRLIYNGTKKGMPEYFMN 2000  
DWV\_mascot -----  
DWV-Moore\_2011 INLSVPCGEVCMHLSKYFNLYL FHKAWLFENPTWRLIYNGTKKGMPEYFMN 2000  
KV\_Fujiyuki\_2004 INLSVPCGEVCMHLSKYFNLYL FHKAWLFENPTWRLIYNGTKKGMPEYFMN 2000



KV\_mascot CVDEISLDSKFKVKVWLQAIIDKYLTRPVKMIRDFLFKWWPQVAYVLSL 2050  
VDV\_Ongus\_2004 CVDEISLDSKFKVKVWLQAIIDKYLTRPVKMIRDFLFKWWPQVAYVLSL 2050  
DWV\_mascot -----  
DWV-Moore\_2011 CVDEISLDSKFGKVKVWLQAIIDKYLTRPVKMIRDFLFKWWPQVAYVLSL 2050  
KV\_Fujiyuki\_2004 CVDEISLDSKFGKVKVWLQAIIDKYLTRPVKMIRDFLFKWWPQVAYVLSL 2050

KV\_mascot LGIIGITAYEMRNPKSTAEDLAEHYVNRHCSSDFWSPGMATPQGLKYSEA 2100  
VDV\_Ongus\_2004 LGIIGITAYEMRNPKSTAEDLAEHYVNRHCSSDFWSPGMATPQGLKYSEA 2100  
DWV\_mascot -----  
DWV-Moore\_2011 LGIIGITAYEMRNPKPTSEELADHYVNRHCSSDFWSPGLASPQGLKYSEA 2100  
KV\_Fujiyuki\_2004 LGIIGITAYEMRNPKPTSEQLADHYVNRHCSSDFWSPGLASPQGLKYSEA 2100

KV\_mascot ITAKAPRIHRLPVTTRPQGSTQQVDAAVNKILQNMVYIGVVFPKVPKPGSKW 2150  
VDV\_Ongus\_2004 ITAKAPRIHRLPVTTRPQGSTQQVDAAVNKILQNMVYIGVVFPKVPKPGSKW 2150  
DWV\_mascot -----  
DWV-Moore\_2011 VTAKAPRIHRLPVTTKPQGSTQQVDAAVNKILQNMVYIGVVFPKVPKPGSKW 2150  
KV\_Fujiyuki\_2004 VTAKAPRIHRLPVTTKPQGSTQQVDAAVNKILQNMVYIGVVFPKVPKPGSKW 2150

KV\_mascot RDINFRCLMLHNRQCLMLRHYIESTAAPPEGTKYYFKYIHNQETRMSGDI 2200  
VDV\_Ongus\_2004 RDINFRCLMLHNRQCLMLRHYIESTAAPPEGTKYYFKYIHNQETRMSGDI 2200  
DWV\_mascot -----  
DWV-Moore\_2011 RDINFRCLMLHNRQCLMLRHYIESTAAPPEGTKYYFKYIHNQETRMSGDI 2200  
KV\_Fujiyuki\_2004 RDINFRCLMLHNRQCLMLRHYIESTAAPPEGTKYYFKYIHNQETRMSGDI 2200

KV\_mascot SGIEIDLLSLPRLYYGGLAGEESFDSNIVLVTMPNRIPECKSIVKFIASH 2250  
VDV\_Ongus\_2004 SGIEIDLLSLPRLYYGGLAGEESFDSNIVLVTMPNRIPECKSIVKFIASH 2250  
DWV\_mascot -----  
DWV-Moore\_2011 SGIEIDLLNLPRLYYGGLAGEESFDSNIVLVTMPNRIPECKSIIKFIASH 2250  
KV\_Fujiyuki\_2004 SGIEIDLLNLPRLYYGGLAGEESFDSNIVLVTMPNRIPECKSIIKFIASH 2250

KV\_mascot AEHARAQNDGVLVTGEHTQLLAFENNNKTPISINADGLYEIVLQGVYTYTYP 2300  
VDV\_Ongus\_2004 AEHARAQNDGVLVTGEHTQLLAFENNNKTPISINADGLYEIVLQGVYTYTYP 2300  
DWV\_mascot -----  
DWV-Moore\_2011 NEHIRAQNDGVLVTGDHTQLLAFENNNKTPISINADGLYEIVLQGVYTYTYP 2300  
KV\_Fujiyuki\_2004 NEHIRAQNDGVLVTGDHTQLLAFENNNKTPISINADGLYEIVLQGVYTYTYP 2300

KV\_mascot YHGDGVCGSILLSRNLQRPIIGIHVAGTEGLHGFGVAEPLVHEMFTGKAI 2350  
VDV\_Ongus\_2004 YHGDGVCGSILLSRNLQRPIIGIHVAGTEGLHGFGVAEPLVHEMFTGKAI 2350  
DWV\_mascot -----  
DWV-Moore\_2011 YHGDGVCGSILLSRNLQRPIIGIHVAGTEGLHGFGVAEPLVHEMFTGKAI 2350  
KV\_Fujiyuki\_2004 YHGDGVCGSILLSRNLQRPIIGIHVAGTEGLHGFGVAEPLVHEMFTGKAI 2350

KV\_mascot ESEREPYDRVYELPLRELEDESIGLDTDLYPIGRVDAKLAHAQSPSTGIK 2400  
VDV\_Ongus\_2004 ESEREPYDRVYELPLRELEDESIGLDTDLYPIGRVDAKLAHAQSPSTGIK 2400  
DWV\_mascot -----  
DWV-Moore\_2011 ESEREPYDRVYELPLRELEDESIGLDTDLYPIGRVDAKLAHAQSPSTGIK 2400  
KV\_Fujiyuki\_2004 ESEREPYDRVYELPLRELEDESIGLDTDLYPIGRVDAKLAHAQSPSTGIK 2400

KV\_mascot KTLIHGTFDVTWTEPNPMSRDPRIAPHDPLKLGCEKHGMPCSPFNKXLE 2450  
VDV\_Ongus\_2004 KTLIHGTFDVTWTEPNPMSRDPRIAPHDPLKLGCEKHGMPCSPFNKXLE 2450  
DWV\_mascot -----  
DWV-Moore\_2011 KTLIHGTFDVRTEPNPMSRDPRIAPHDPLKLGCEKHGMPCSPFNKXLE 2450  
KV\_Fujiyuki\_2004 KTLIHGTFDVRTEPNPMSRDPRIAPHDPLKLGCEKHGMPCSPFNKXLE 2450

KV\_mascot LATTHLKEKLISVVKPINGCKIRSLQDAVCGVPGLDGFDSISWNTSAGFP 2500  
VDV\_Ongus\_2004 LATTHLKEKLISVVKPINGCKIRSLQDAVCGVPGLDGFDSISWNTSAGFP 2500  
DWV\_mascot -----  
DWV-Moore\_2011 LATNHLKEKLVSVVKPINGCKIRSLQDAVCGVPGLDGFDSISWNTSAGFP 2500  
KV\_Fujiyuki\_2004 LATNHLKEKLVSVVKPINGCKIRSLQDAVCGVPGLDGFDSISWNTSAGFP 2500

KV\_mascot LSSLKPPGSSGKRWLFDIELQDSGCYLLRGMRPELEIQLTSTQLMRKKGM 2550  
VDV\_Ongus\_2004 LSSLKPPGSSGKRWLFDIELQDSGCYLLRGMRPELEIQLTSTQLMRKKGM 2550  
DWV\_mascot -----  
DWV-Moore\_2011 LSSLKPPGTSGKRWLFDIELQDSGCYLLRGMRPELEIQLTSTQLMRKKGI 2550  
KV\_Fujiyuki\_2004 LSSLKPPGASGKRWLFDIELQDSGCYLLRGMRPELEIQLTSTQLMRKKGI 2550

KV\_mascot KPHTIFTDCLKDTCLPVEKCRIPGKTRIFSI SPVQFTIPFRQYYLDFMAS 2600  
VDV\_Ongus\_2004 KPHTIFTDCLKDTCLPVEKCRIPGKTRIFSI SPVQFTIPFRQYYLDFMAS 2600  
DWV\_mascot -----  
DWV-Moore\_2011 KPHTIFTDCLKDTCLPVEKCRIPGKTRIFSI SPVQFTIPFRQYYLDFMAS 2600  
KV\_Fujiyuki\_2004 KPHTIFTDCLKDTCLPVEKCRIPGKTRIFSI SPVQFTIPFRQYYLDFMAS 2600

KV\_mascot YRAARLNAEHGIGIDVNSLEWTNLATSLSKYGTHIVTG DYKNFGPGLDSD 2650  
VDV\_Ongus\_2004 YRAARLNAEHGIGIDVNSLEWTNLATSLSKYGTHIVTG DYKNFGPGLDSD 2650  
D WV\_mascot -----  
D WV-Moore\_2011 YRAARLNAEHGIGIDVNSLEWTNLATRLSKYGTHIVTG DYKNFGPGLDSD 2650  
KV\_Fujiyuki\_2004 YRAARLNAEHGIGIDVNSLEWTNLATSLSKYGTHIVTG DYKNFGPGLDSD 2650

KV\_mascot VAASAFEIIIDWVLNYTEEDDKDEMKRVMWTMAQEILAPSHLCRDLVYRV 2700  
VDV\_Ongus\_2004 VAASAFEIIIDWVLNYTEEDDKDEMKRVMWTMAQEILAPSHLCRDLVYRV 2700  
D WV\_mascot -----  
D WV-Moore\_2011 VAASAFEIIIDWVLHYTEEDNKDEMKRVMWTMAQEILAPSHLCRDLVYRV 2700  
KV\_Fujiyuki\_2004 VAASAFEIIIDWVLHYTEEDNKDEMKRVMWTMAQEILAPSHLCRDLVYRV 2700

KV\_mascot PCGIPSGSPITDILNTISNCLLIRLAWQGITDLPLSEFSRHVVLV CYGDD 2750  
VDV\_Ongus\_2004 PCGIPSGSPITDILNTISNCLLIRLAWQGITDLPLSEFSRHVVLV CYGDD 2750  
D WV\_mascot -----  
D WV-Moore\_2011 PCGIPSGSPITDILNTISNCLLIRLAWLGITDLPLSEFSQNVVLV CYGDD 2750  
KV\_Fujiyuki\_2004 PCGIPSGSPITDILNTISNCLLIRLAWLGITDLPLSEFSQNVVLV CYGDD 2750

KV\_mascot LIMNVSDEMIDKFNAVTIGDFFSRYKMEFTDQDKSGNTVVRWRTLQTATFL 2800  
VDV\_Ongus\_2004 LIMNVSDEMIDKFNAVTIGDFFSRYKMEFTDQDKSGNTVVRWRTLQTATFL 2800  
D WV\_mascot -----  
D WV-Moore\_2011 LIMNVSDNMIDKFNAVTIGKFFS QYKMEFTDQDKSGNTVKWRTLQTATFL 2800  
KV\_Fujiyuki\_2004 LIMNVSDNMIDKFNAVTIGKFFS QYEMVFTDQDKSGNTVKWRTLQTATFL 2800

KV\_mascot KHGFLKHPTRPVFLANLDKVSIEGTTNWTHARGLGRRVATIENAKQALEL 2850  
VDV\_Ongus\_2004 KHGFLKHPTRPVFLANLDKVSIEGTTNWTHARGLGRRVATIENAKQALEL 2850  
D WV\_mascot -----  
D WV-Moore\_2011 KHGFLKHPTRPVFLANLDKVSVEGTTNWTHARGLGRRTATIENAKQALEL 2850  
KV\_Fujiyuki\_2004 KHGFLKHPTRPVFLANLDKVSVEGTTNWTHARGLGRRATIENAKQALEL 2850

KV\_mascot AFGWGPEYFNHVRNTIKMAFDKLG IYEDLITWEEMDVRCYASA 2893  
VDV\_Ongus\_2004 AFGWGPEYFNHVRNTIKMAFDKLG IYEDLITWEEMDVRCYASA 2893  
D WV\_mascot -----  
D WV-Moore\_2011 AFGWGPEYFN YVRNTIKMAFDKLG IYEDLITWEEMDVRCYASA 2893  
KV\_Fujiyuki\_2004 AFGWGPEYFN YVRNTIKMAFDKLG IYEDLITWEEMDVRCYASA 2893
